# Supplementary material
Source: publisher site journal article supplement (https://www.spandidos-publications.com/6449/downloadSupplementary)

Figure S1. High-performance liquid chromatograph of the 75% methyl alcohol layers of the supercritical carbon dioxide fluid extraction of *Chrysanthemum indicum* Linnén. mAU, m absorbance unit.

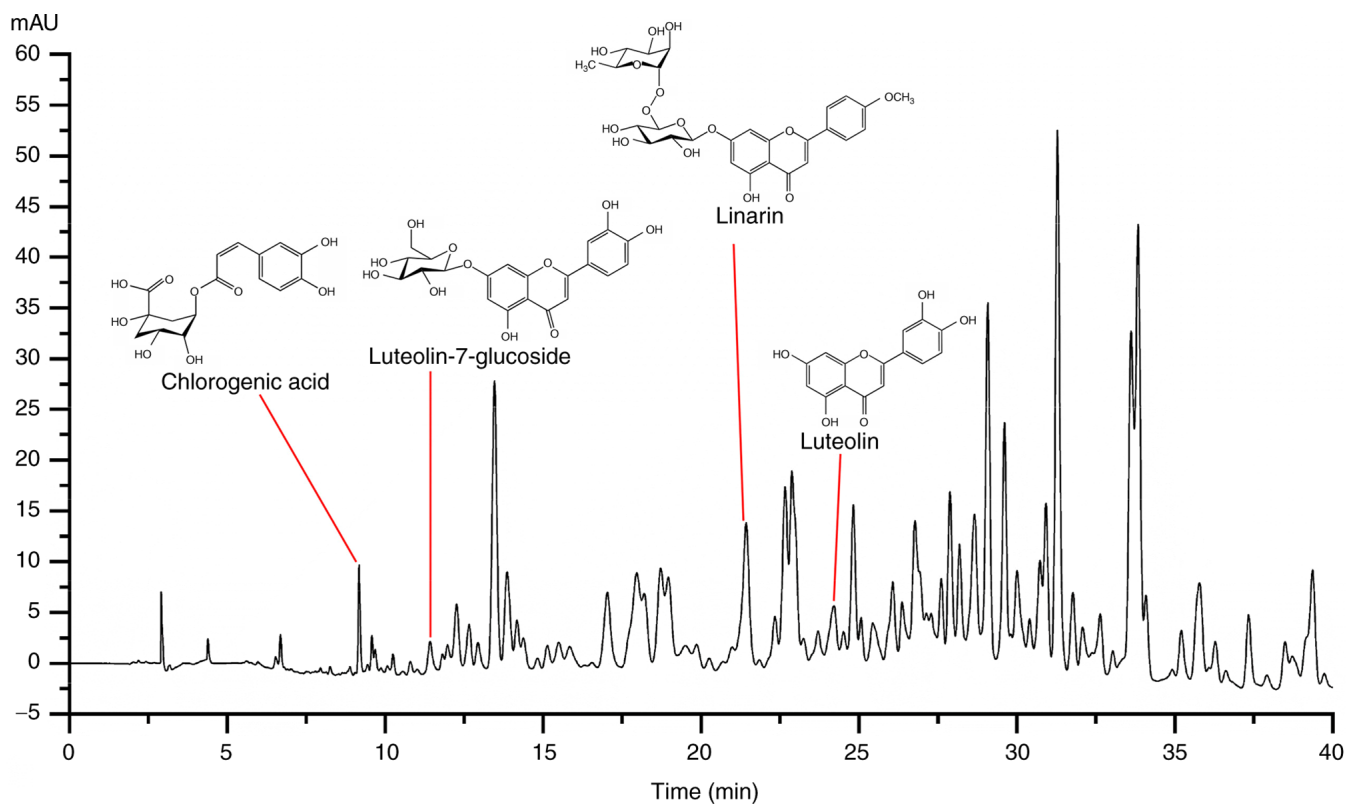

Supplement: Supplementary file 1 [file downloadSupplementary]
